# Supplementary material for: Characterization of the Genetic Variability within Ziziphus nummularia Genotypes by Phenotypic Traits and SSR Markers with Special Reference to Geographic Distribution
Source: MDPI journal article supplement (doi:10.3390/genes14010155), 2023-01-06
Supplement: s1 [file s1]

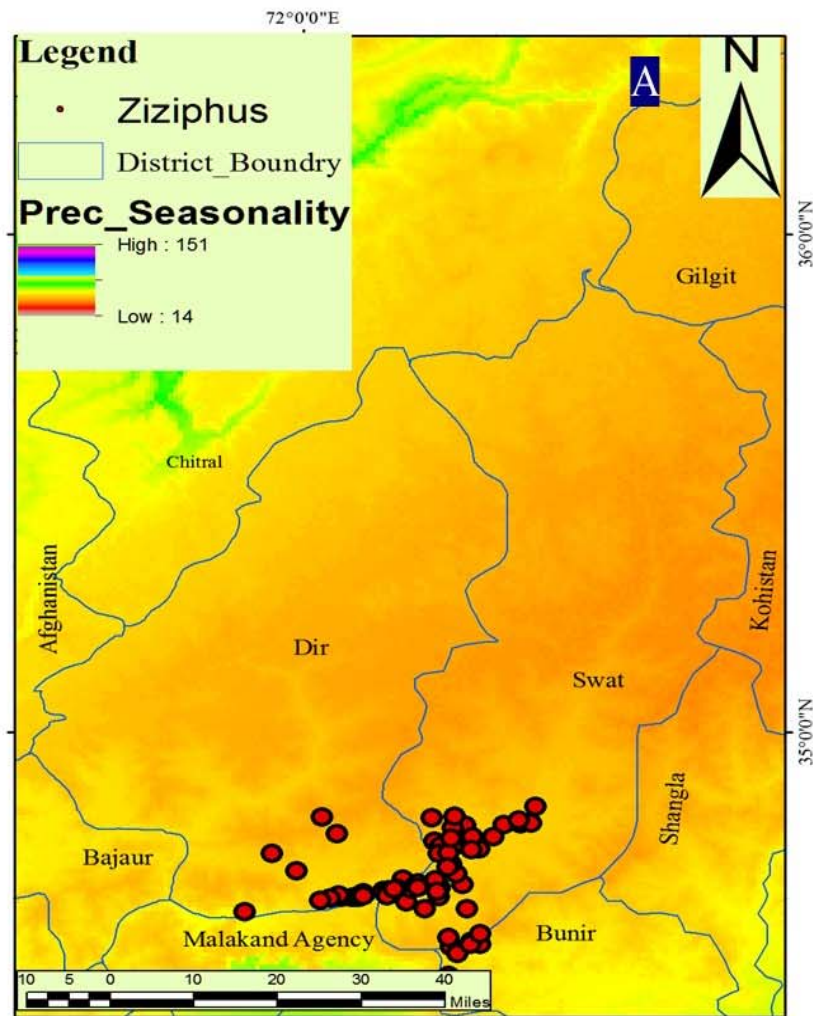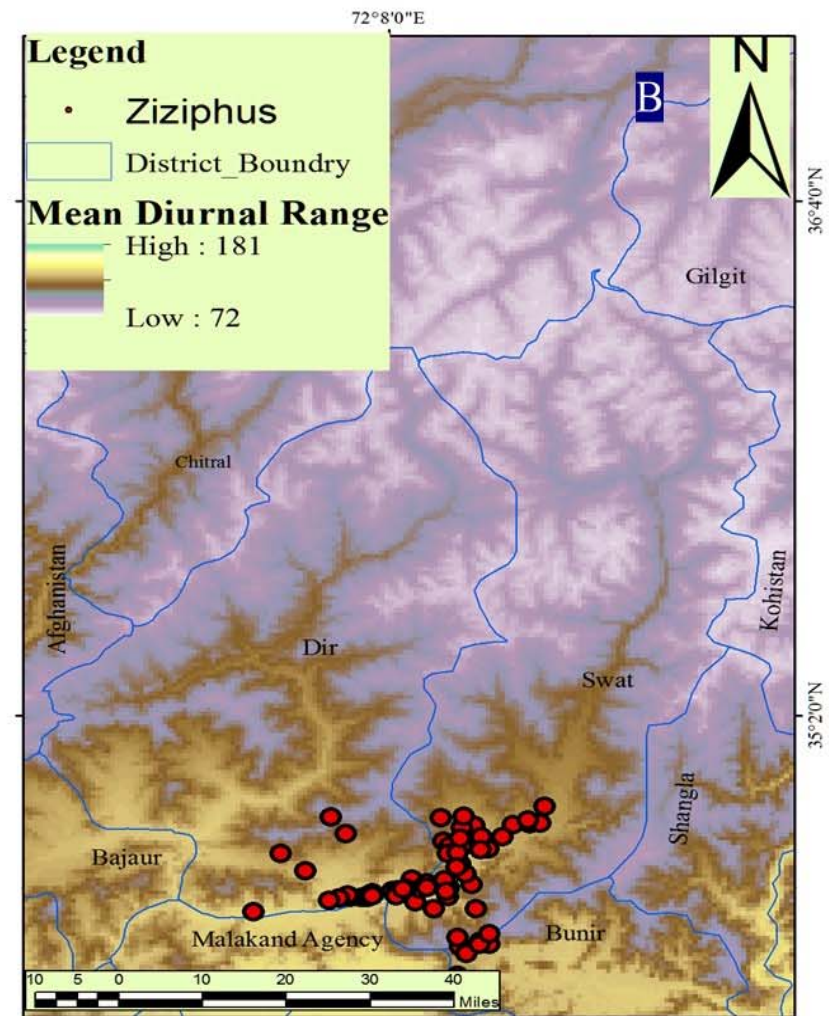

Figure S1. Showed that the ArcGIS mapping of a bioclimatic variable on the selected regions, showed variation in (A), Prec-Seasonality and (B), Mean diurnal range, respectively

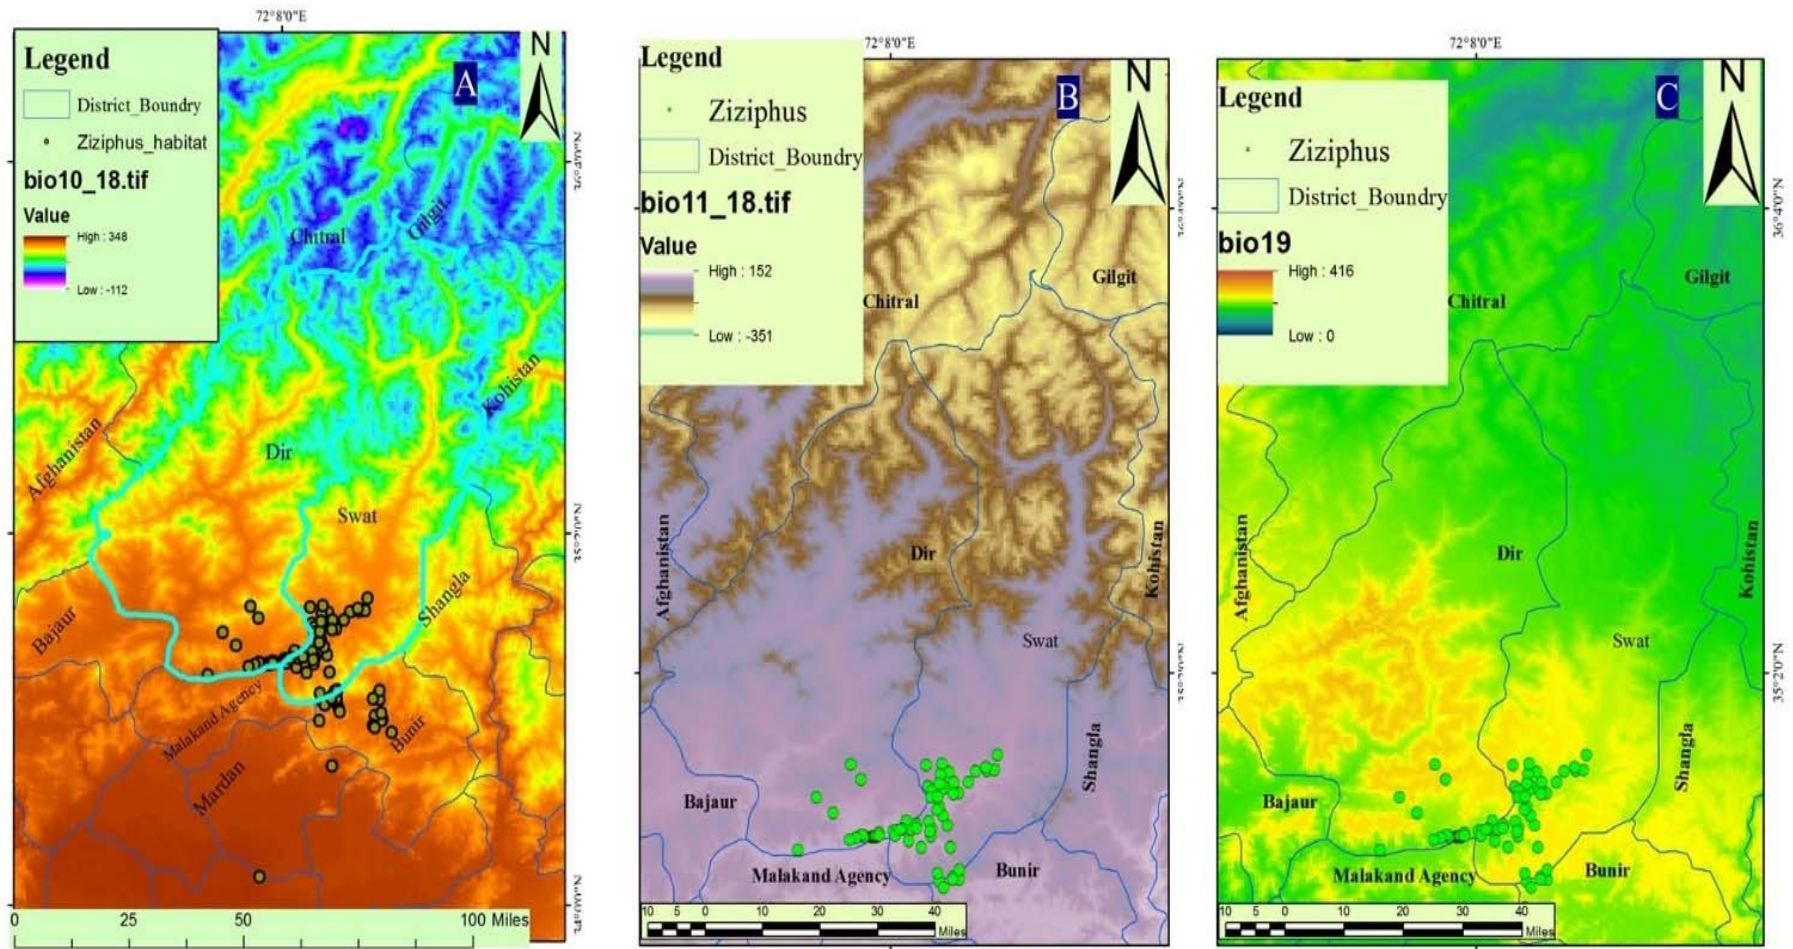

Figure S2. Applied ArcGIS mapping of a bioclimatic variable on the selected regions, (A), distribution in the selected remote regions of *Z. nummularia* genotypes, and (B and C), showing accrued temperature ranges.
